# Supplementary material
Source: publisher site journal article supplement (https://www.dovepress.com/article/210185)
Supplement: Supplementary file 1 [file get_supplementary_file.php]

**Table S1.** Univariate and multivariate of progression-free survival before propensity-score matching.

| Factors |  | Univariate analysis | | Multivariate analysis | |
| --- | --- | --- | --- | --- | --- |
| HR (95% CI) | *P* | HR (95% CI) | *P* |
| Age | < 60, ≥60 | 1.251 (0.772-2.026) | 0.364 | 1.039 (0.616-1.752) | 0.886 |
| Gender | Female, Male | 1.161 (0.688-1.960) | 0.576 | 1.029 (0.592-1.788) | 0.920 |
| CEA level | ≤5 ng/ml, > 5 ng/ml | 0.700 (0.403-1.219) | 0.208 |  |  |
| Treatment sequence | Systemic therapy first, Primary tumor resection first | 0.767 (0.474-1.239) | 0.278 |  |  |
| Hepatic steatosis | No, Yes | 0.544 (0.317-0.936) | 0.028 | 0.493 (0.281-0.866) | 0.014 |
| BMI | ≤25 kg/m2, >25 kg/m2 | 1.602 (0.966-2.658) | 0.068 |  |  |
| Maximum size of primary tumor | ≤5 cm, >5 cm | 1.203 (0.728-1.987) | 0.472 |  |  |
| Primary tumor location | Rectum, Colon | 0.800 (0.477-1.342) | 0.397 |  |  |
| Histological type | Adenocarcinoma, Mucinous | 0.955 (0.411-2.220) | 0.914 |  |  |
| Differentiation grade | G1-2, G3 and other | 1.499 (0.828-2.713) | 0.181 |  |  |
| Clinical T stage | T1-2, T3-4 | 2.263 (0.947-5.894) | 0.065 |  |  |
| Lymph nodes metastases | No, Yes | 1.002 (0.617-1.626) | 0.995 |  |  |
| Maximum length of CLLMs | ≤5 cm, >5 cm | 1.416 (0.858-2.337) | 0.173 |  |  |
| Number of CLLMs | ≤3, >3 | 1.001 (0.584-1.715) | 0.998 |  |  |
| Distribution of CLLMs | Unilobar, Bilobar | 0.992 (0.592-1.663) | 0.977 |  |  |
| Use of TACE | No, Yes | 2.010 (1.119-3.610) | 0.020 | 2.142 (1.157-3.965) | 0.015 |
| Use of PVE | No, Yes | 1.204 (0.596-2.433) | 0.600 |  |  |
| Targeted therapy | No, Yes | 0.433 (0.262-0.717) | 0.001 | 0.460 (0.270-0.786) | 0.005 |
| Cycles of targeted therapy | ≤12, >12 | 0.834 (0.531-1.309) | 0.430 |  |  |
| Chemotherapy regiments | CapeOX, FOLFOX or FOLFIRI | 0.833 (0.411-1.686) | 0.611 |  |  |
| Cycles of chemotherapy | ≤12, >12 | 1.002 (0.969-1.036) | 0.918 |  |  |
| RAS status | RAS wt, RAS mt | 0.960 (0.414-2.227) | 0.925 |  |  |

**Note:** Patient and facility variables were accounted for in this model.

**Abbreviations:** HR, Hazard ratio; CI, confidence intervals; CLLMs, colorectal liver-limited metastases; TACE, transarterial chemoembolization; PVE, portal vein embolization; wt, wild-type; mt, mutant-type.

**Table S2**. Univariate and multivariate of overall survival before propensity-score matching.

| Factors |  | Univariate analysis | | Multivariate analysis | |
| --- | --- | --- | --- | --- | --- |
| HR (95% CI) | *P* | HR (95% CI) | *P* |
| Age | < 60, ≥60 | 0.868 (0.587-1.284) | 0.480 | 0.989 (0.720-1.359) | 0.948 |
| Gender | Female, Male | 0.835 (0.600-1.161) | 0.283 | 0.842 (0.604-1.174) | 0.310 |
| CEA level | ≤5 ng/ml,> 5 ng/ml | 1.046 (0.661-1.653) | 0.849 |  |  |
| Treatment sequence | Systemic therapy first, Primary tumor resection first | 1.439 (1.032-2.005) | 0.032 | 1.470 (1.054-2.050) | 0.023 |
| Hepatic steatosis | No, Yes | 0.541 (0.386-0.759) | <0.001 | 0.559 (0.398-0.785) | 0.001 |
| BMI | ≤25 kg/m2, >25 kg/m2 | 1.078 (0.784-1.481) | 0.644 |  |  |
| Maximum size of primary tumor | ≤5 cm, >5 cm | 1.258 (0.911-1.738) | 0.163 |  |  |
| Primary tumor location | Rectum, Colon | 1.020 (0.743-1.401) | 0.903 |  |  |
| Histological type | Adenocarcinoma, Mucinous | 1.679 (0.742-3.799) | 0.342 |  |  |
| Differentiation grade | G1-2, G3 and other | 1.008 (0.726-1.399) | 0.964 |  |  |
| Clinical T stage | T1-2, T3-4 | 1.119 (0.636-1.970) | 0.696 |  |  |
| Lymph nodes metastases | No, Yes | 1.141 (0.846-1.538) | 0.388 |  |  |
| Maximum length of CLLMs | ≤5 cm, >5 cm | 1.474 (1.030-2.108) | 0.034 |  |  |
| Number of CLLMs | ≤3, >3 | 1.149 (0.854-1.546) | 0.359 |  |  |
| Distribution of CLLMs | Unilobar, Bilobar | 1.060 (0.783-1.434) | 0.707 |  |  |
| Use of TACE | No, Yes | 1.348 (0.968-1.878) | 0.077 |  |  |
| Use of PVE | No, Yes | 0.743 (0.532-1.038) | 0.083 |  |  |
| Targeted therapy | No, Yes | 0.699 (0.517-0.946) | 0.020 | 0.695 (0.512-0.943) | 0.019 |
| Cycles of targeted therapy | ≤12, >12 | 1.059 (0.559-2.007) | 0.984 |  |  |
| Chemotherapy regiments | CapeOX, FOLFOX/FOLFIRI | 1.064 (0.737-1.536) | 0.739 |  |  |
| Cycles of chemotherapy | ≤12, >12 | 1.007 (0.951-1.066) | 0.824 |  |  |
| RAS status | RAS wt, RAS mt | 1.119 (0.806-1.553) | 0.504 |  |  |

**Note:** Patient and facility variables were accounted for in this model.

**Abbreviations:** HR, Hazard ratio; CI, confidence intervals; CLLMs, colorectal liver-limited metastases; TACE, transarterial chemoembolization; PVE, portal vein embolization; wt, wild-type; mt, mutant-type.
